# Supplementary material for: GABAergic basal forebrain projections to the periaqueductal gray promote food consumption, reward and predation
Source: PubMed Central journal article supplement (PMC8608827; doi:10.1038/s41598-021-02157-7), 2021-11-22
Supplement: 41598_2021_2157_MOESM1_ESM.pdf [file 41598_2021_2157_MOESM1_ESM.pdf]

## SUPPLEMENTARY FIGURE LEGENDS

### **Supplementary Figure 1. Optic ferrule placement for stimulation of BF<sup>GAD2+</sup> cell bodies.**

Schematic representation of optic ferrule tip placement in BF. The circles represent individual animals ChR2 (red), n = 27; eYFP (grey), n = 30.

### **Supplementary Figure 2. Effects of BF<sup>GAD2+</sup> photostimulation during fear acquisition.**

Freezing levels (context A) of each CS-US presentations with laser stimulation during fear conditioning. ChR2, n = 7; eYFP, n = 6.

### **Supplementary Figure 3. Animals default to fictive eating during BF<sup>GAD2+</sup> stimulation in the presence of immobilized prey.**

**a**, Percent time attacking an immobilized (dead) cricket during laser<sup>ON</sup> vs. laser<sup>OFF</sup> epochs. ChR2, n = 10; eYFP, n = 11. **b**, Number of attacks of an immobilized cricket during laser<sup>ON</sup> vs. laser<sup>OFF</sup> epochs. ChR2, n = 10; eYFP, n = 11. **c**, Percent time spent fictive eating during laser<sup>ON</sup> vs. laser<sup>OFF</sup> epochs of the immobilized cricket assay. ChR2, Wilcoxon signed rank test,  $W = 21$ , \*  $p < 0.05$ . ChR2, n = 10; eYFP, n = 11. **d**, Percent time attacking an immobile artificial prey (robobug) during laser<sup>ON</sup> vs. laser<sup>OFF</sup> epochs. ChR2, n = 11; eYFP, n = 11. **e**, Number of attacks of an immobile artificial prey (robobug) during laser<sup>ON</sup> vs. laser<sup>OFF</sup> epochs. ChR2, n = 11; eYFP, n = 11. **f**, Percent time spent fictive eating during laser<sup>ON</sup> vs. laser<sup>OFF</sup> epochs of the immobile artificial prey assay. ChR2, Wilcoxon signed rank test,  $W = 21$ , \*  $p < 0.05$ .

### **Supplementary Figure 4. Social interaction is not affected by BF<sup>GAD2+</sup> stimulation.**

**a**, Diagram depicting intruder test design. Social interaction time includes nose-to-nose, nose-to-rear, grooming intruder and mounting. **b**, Percent time spent interacting with a female intruder. Female Intruder: Females: ChR2, n = 6; eYFP, n = 8. Males: ChR2, n = 6; eYFP, n = 6.

**c**, Percent time spent interacting with a male intruder. Male intruder: Females: ChR2, n = 6; eYFP, n = 8; Males: ChR2, n = 6; eYFP, n = 6. Schematics (**a**) were created using BioRender and PowerPoint.

**Supplementary Figure 5. BF<sup>GAD2+</sup> → PAG optic ferule placement for pathway activation.**

Schematic representation of optic ferule end placement in PAG. The circles represent individual animals ChR2 (red), n = 12; eYFP (grey), n = 10.

**Supplementary Figure 6. Expression of conditioning-related freezing and fictive eating for BF<sup>GAD2+</sup> → PAG optogenetic experiment.** Related to Figure 5. **a**, Freezing levels during final two CS trials of conditioning. ChR2, n = 8; eYFP, n = 7. **b**, Fictive eating during laser<sup>ON</sup> vs. laser<sup>OFF</sup> CS trials. ChR2, Wilcoxon signed rank test,  $W = 28$ , \*  $p < 0.05$ . ChR2, n = 8; eYFP, n = 7.

**Supplementary Movie 1. BF<sup>GAD2+</sup> activation induces cricket hunting.** Related to Figure 3. Optogenetic activation of BF<sup>GAD2+</sup> neurons caused mice to engage in predatory behaviors toward a live cricket.

**Supplementary Movie 2. BF<sup>GAD2+</sup> activation induces predatory hunting of an artificial prey.** Related to Figure 3. Optogenetic activation of BF<sup>GAD2+</sup> neurons caused mice to engage in predator-like attacks towards an artificial prey.

**Supplementary Movie 3. BF<sup>GAD2+</sup> activation induces predatory hunting of an interactive prey.** Related to Figure 3. Optogenetic activation of BF<sup>GAD2+</sup> neurons caused mice to engage in predator-like attacks towards an interactive artificial prey.

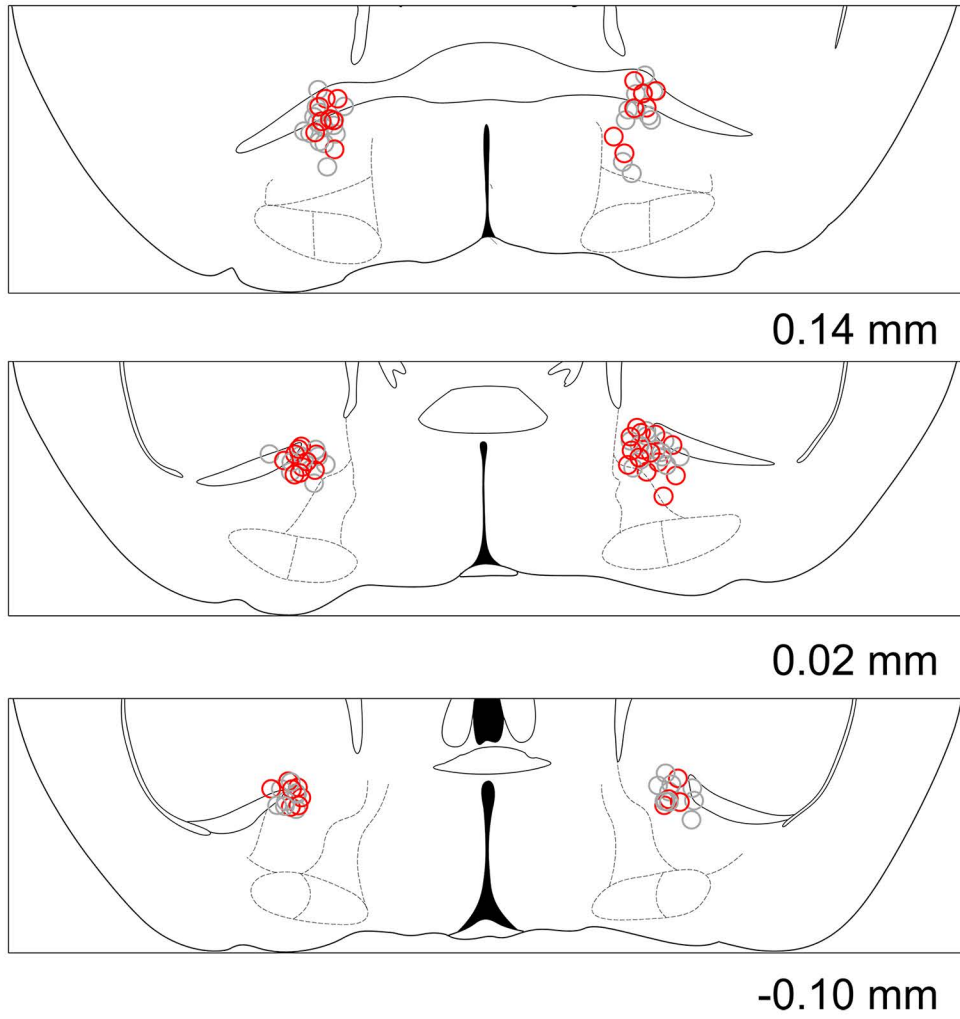

**Supplementary Figure 1. Optic ferrule placement for stimulation of  $BF^{GAD2+}$  cell bodies.** Schematic representation of optic ferrule tip placement in BF. The circles represent individual animals ChR2 (red),  $n = 27$ ; eYFP (grey),  $n = 30$ .

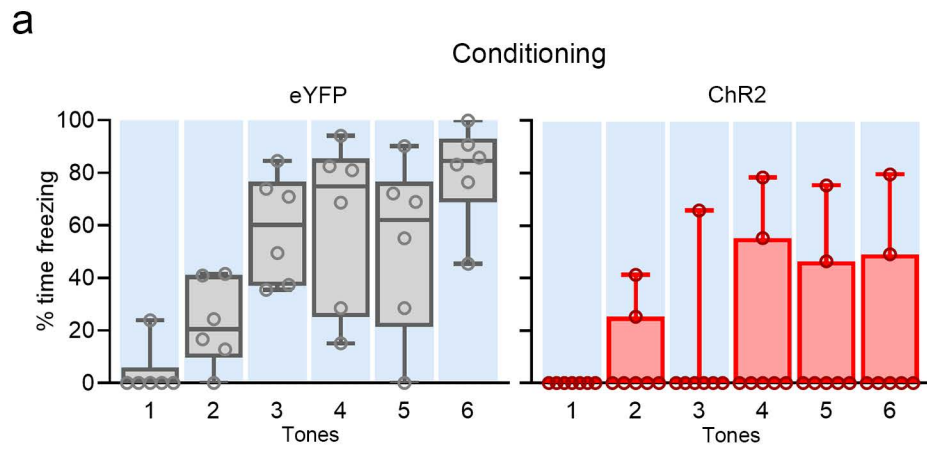

**Supplementary Figure 2. Effects of  $BF^{GAD2+}$  photostimulation during fear acquisition.**

Freezing levels (context A) of each CS-US presentations with laser stimulation during fear conditioning. ChR2, n = 7; eYFP, n = 6.

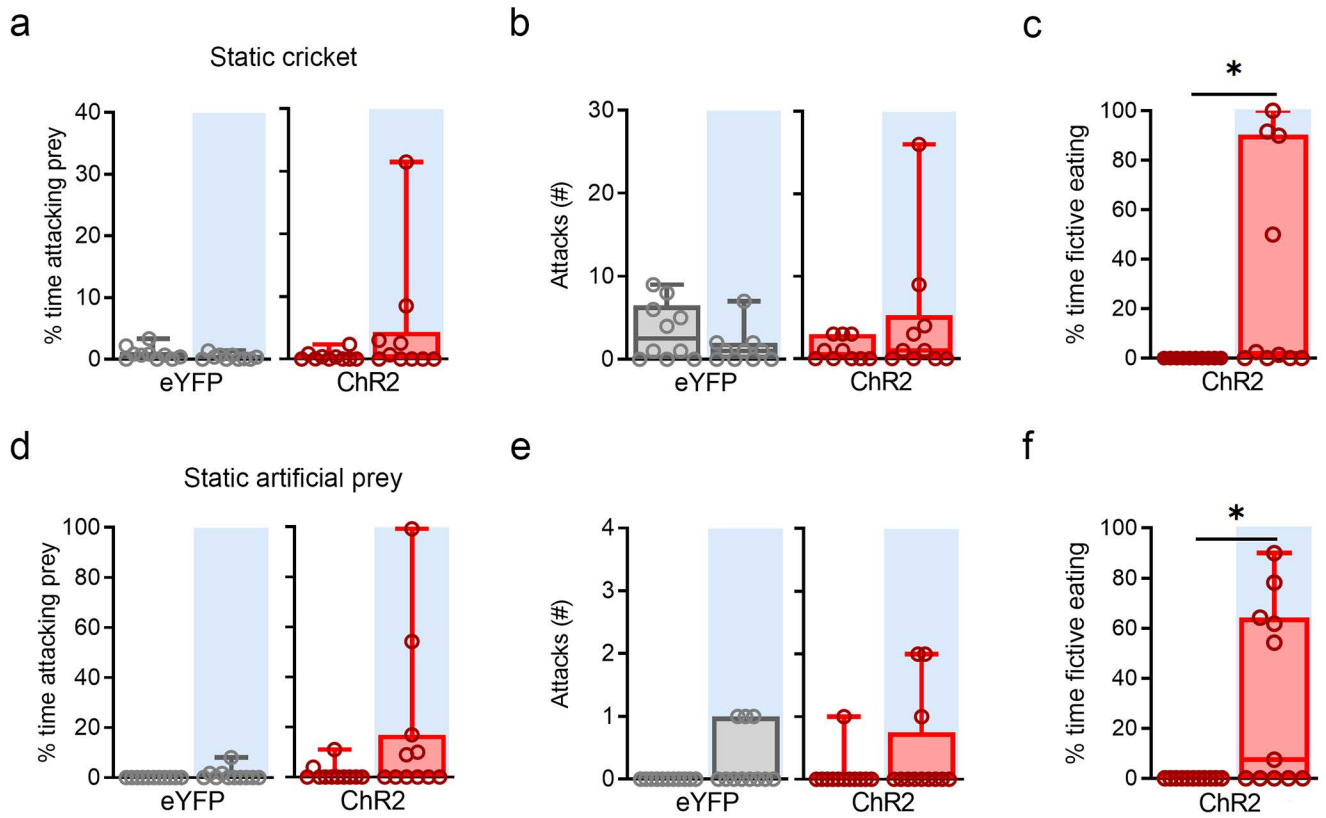

**Supplementary Figure 3. Animals default to fictive eating during  $BF^{GAD2+}$  stimulation in the presence of immobilized prey.**

**a**, Percent time attacking an immobilized (dead) cricket during  $laser^{ON}$  vs.  $laser^{OFF}$  epochs. ChR2,  $n = 10$ ; eYFP,  $n = 11$ . **b**, Number of attacks of an immobilized cricket during  $laser^{ON}$  vs.  $laser^{OFF}$  epochs. ChR2,  $n = 10$ ; eYFP,  $n = 11$ . **c**, Percent time spent fictive eating during  $laser^{ON}$  vs.  $laser^{OFF}$  epochs of the immobilized cricket assay. ChR2, Wilcoxon signed rank test,  $W = 21$ , \*  $p < 0.05$ . ChR2,  $n = 10$ ; eYFP,  $n = 11$ . **d**, Percent time attacking an immobile artificial prey (robobug) during  $laser^{ON}$  vs.  $laser^{OFF}$  epochs. ChR2,  $n = 11$ ; eYFP,  $n = 11$ . **e**, Number of attacks of an immobile artificial prey (robobug) during  $laser^{ON}$  vs.  $laser^{OFF}$  epochs. ChR2,  $n = 11$ ; eYFP,  $n = 11$ . **f**, Percent time spent fictive eating during  $laser^{ON}$  vs.  $laser^{OFF}$  epochs of the immobile artificial prey assay. ChR2, Wilcoxon signed rank test,  $W = 21$ , \*  $p < 0.05$ .

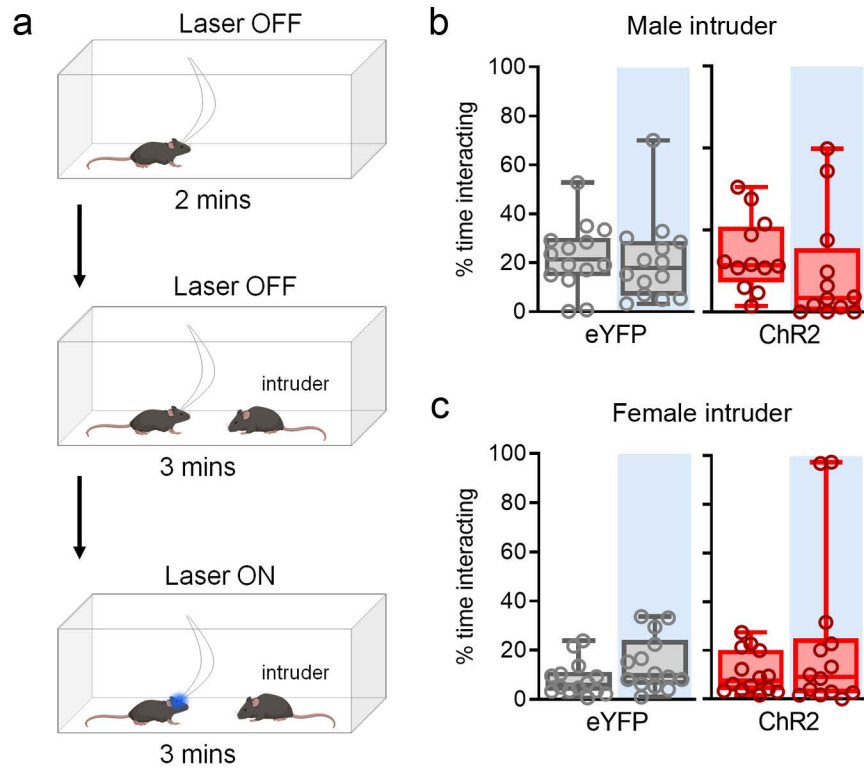

**Supplementary Figure 4. Social interaction is not affected by BF<sup>GAD2+</sup> stimulation.**

**a**, Diagram depicting intruder test design. Social interaction time includes nose-to-nose, nose-to-rear, grooming intruder and mounting. **b**, Percent time spent interacting with a female intruder. Female Intruder: Females: ChR2, n = 6; eYFP, n = 8. Males: ChR2, n = 6; eYFP, n = 6. **c**, Percent time spent interacting with a male intruder. Male intruder: Females: ChR2, n = 6; eYFP, n = 8; Males: ChR2, n = 6; eYFP, n = 6. Schematics (**a**) were created using BioRender and PowerPoint.

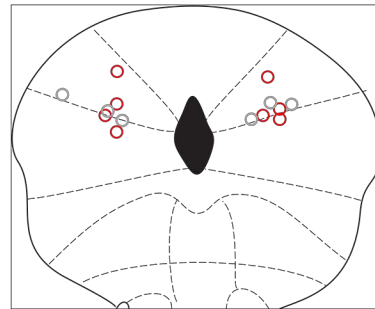

-4.46 mm

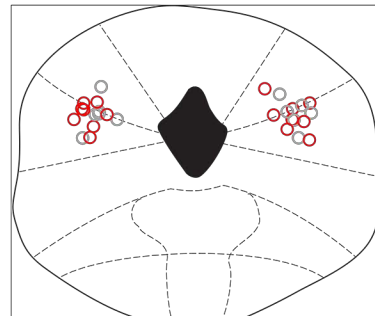

-4.60 mm

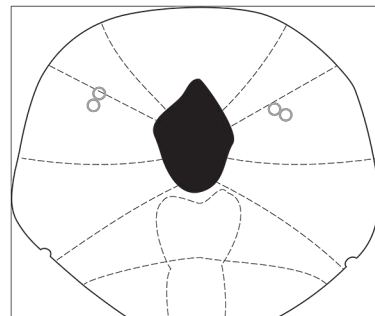

-4.72 mm

**Supplementary Figure 5.  $BF^{GAD2+} \rightarrow$  PAG optic ferule placement for pathway activation.**

Schematic representation of optic ferule end placement in PAG. The circles represent individual animals Chr2 (red),  $n = 12$ ; eYFP (grey),  $n = 10$ .

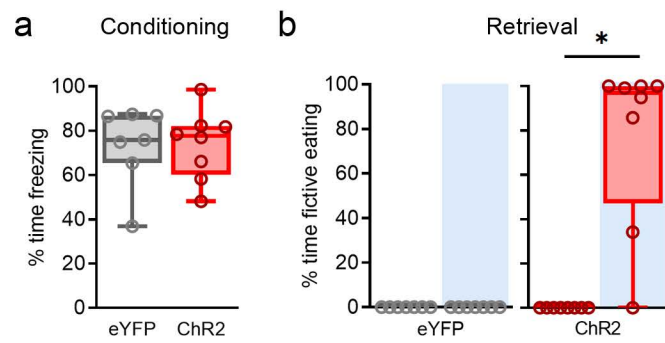

**Supplementary Figure 6. Expression of conditioning-related freezing and fictive eating for  $BF^{GAD2+} \rightarrow PAG$  optogenetic experiment.** Related to Figure 5. **a**, Freezing levels during final two CS trials of conditioning. ChR2,  $n = 8$ ; eYFP,  $n = 7$ . **b**, Fictive eating during laser<sup>ON</sup> vs. laser<sup>OFF</sup> CS trials. ChR2, Wilcoxon signed rank test,  $W = 28$ , \*  $p < 0.05$ . ChR2,  $n = 8$ ; eYFP,  $n = 7$ .
